# Supplementary material for: Spectral evidence for multi-pathway contribution to the upconversion pathway in NaYF4:Yb3+,Er3+ phosphors
Source: Royal Society of Chemistry journal article supplement (doi:10.1039/c7cp00048k), 2017-01-01

### Supporting Information.

**Figure S1.** One-photon luminescence of continuous wave (cw) and nanosecond (ns) pulse laser excitations.

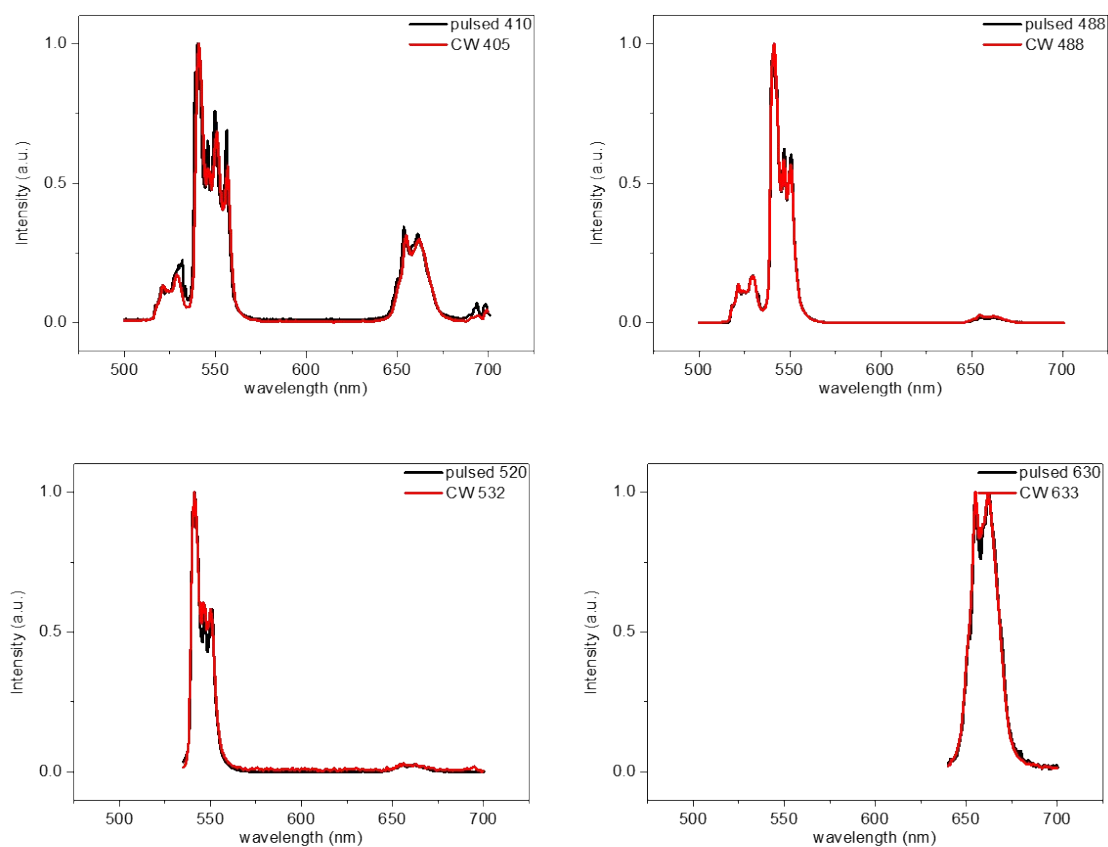

**Figure S2.** Time-resolved photoluminescence spectra of NaYF<sub>4</sub>:Yb<sup>3+</sup>, Er<sup>3+</sup> phosphor with 660-nm detection. Note that the phosphor was excited with a nanosecond pulse laser at 640 nm to probe <sup>4</sup>F<sub>11/2</sub> → <sup>4</sup>I<sub>15/2</sub> (660 nm) transition.

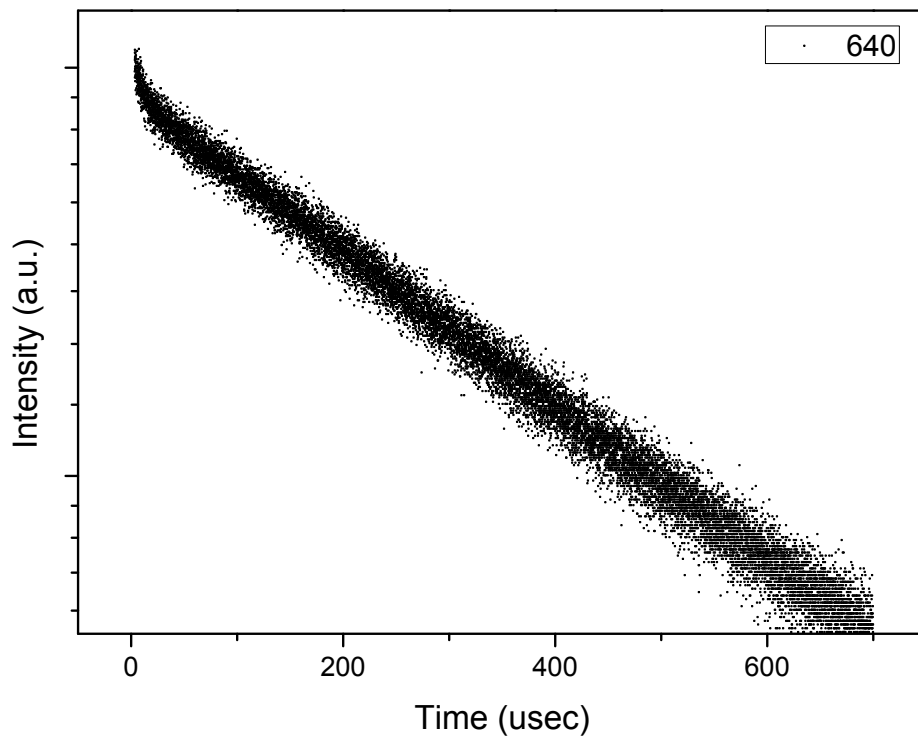

**Figure S3.** Comparison of red emission intensity at 405, 488, 532, and 632.8 nm excitations at 3 mW power.

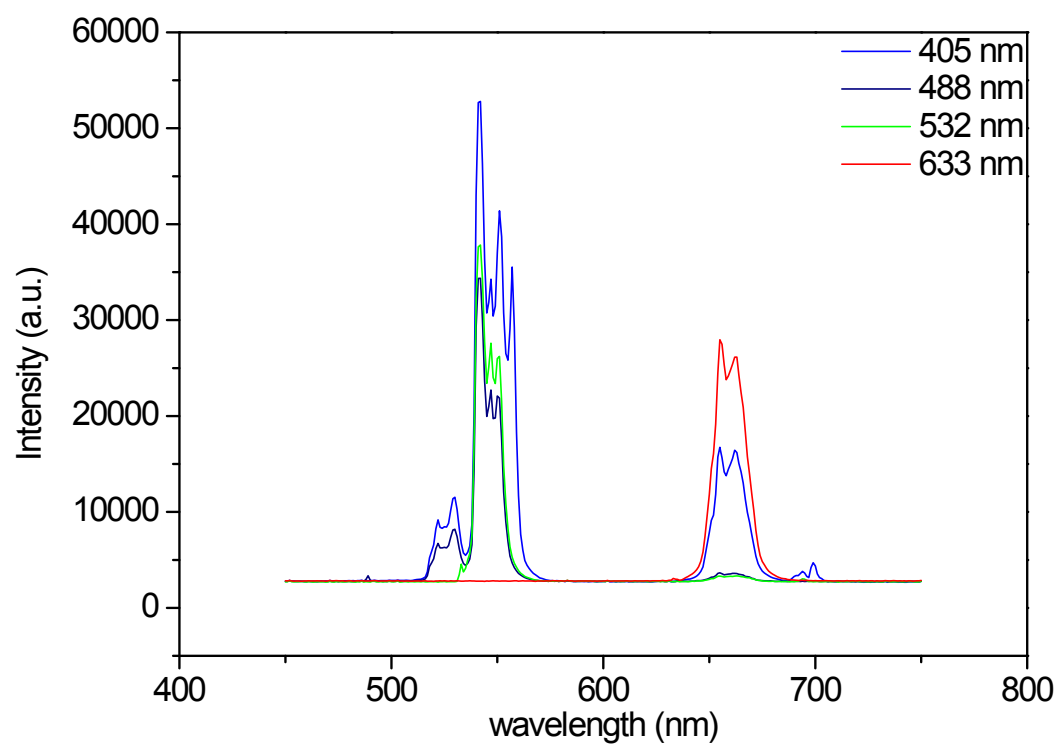

**Figure S4.** Power density conversion table and knife edge methods

| Power (mW) | Power density (W/cm <sup>2</sup> ) |
|------------|------------------------------------|
| 0.05       | 0.995223                           |
| 0.1        | 1.990446                           |
| 0.15       | 2.985669                           |
| 0.2        | 3.980892                           |
| 0.25       | 4.976115                           |
| 0.3        | 5.971338                           |
| 0.4        | 7.961783                           |
| 0.6        | 11.94268                           |
| 0.8        | 15.92357                           |
| 1.0        | 19.90446                           |
| 2          | 39.80892                           |

We measured beam spot size through the knife edge method that record the total power in the beam as a knife edge is translated through the beam using a calibrated translation stage. The beam spot is assumed Gaussian profile and fitted as follow equation.

$$y = A * \pi/4 * w * w * (1 + \text{erf}(\text{sqrt}(2) * (x - x_0)/w)) + y_0;$$

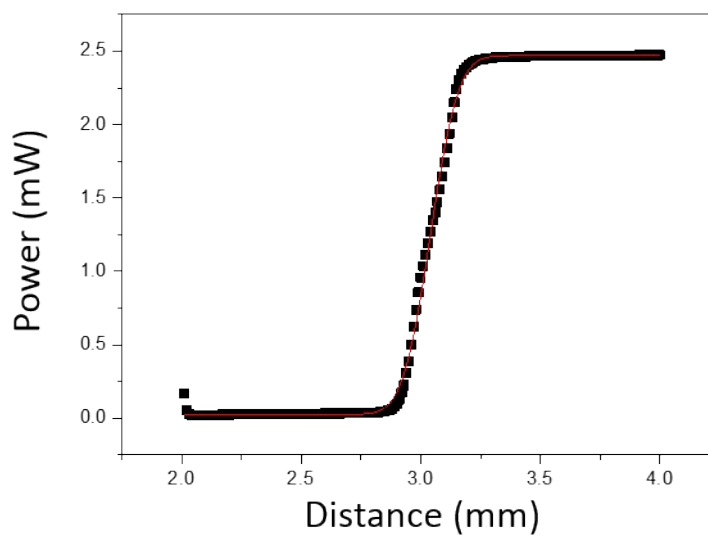

The measured beam size is 8 micrometers.

**Figure S5.** XRD data of UC powder.

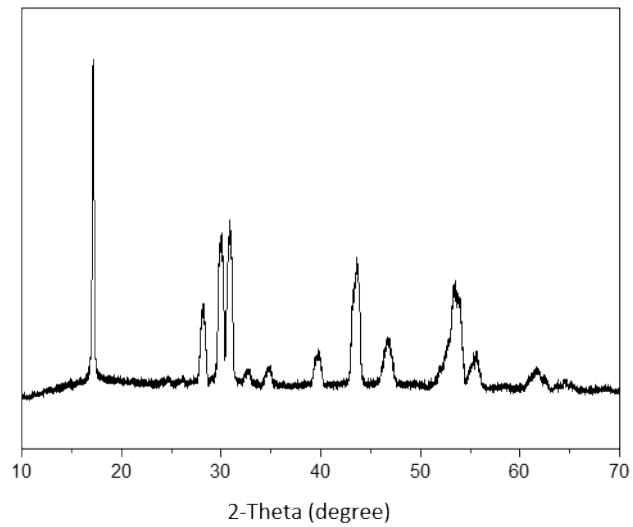

X-ray diffraction (XRD) results of the  $\text{NaY}_x\text{Yb}_y\text{Er}_z\text{F}_4$  ( $x=0.77$   $y=0.20$   $z=0.03$ ) green phosphors. The peak positions of these upconversion materials agree with hexagonal  $\text{NaYF}_4:\text{Yb}^{3+},\text{Er}^{3+}$  crystal (the line patterns are matched Joint Committee on Powder Diffraction Standards file number PDF 16-0334). Also there was a small portion of XRD cubic phase peak patterns (the line patterns are matched Joint Committee on Powder Diffraction Standards file number PDF 77-2042).

**Figure S6.** Compare UC decay curves to the routine PL decay ones.

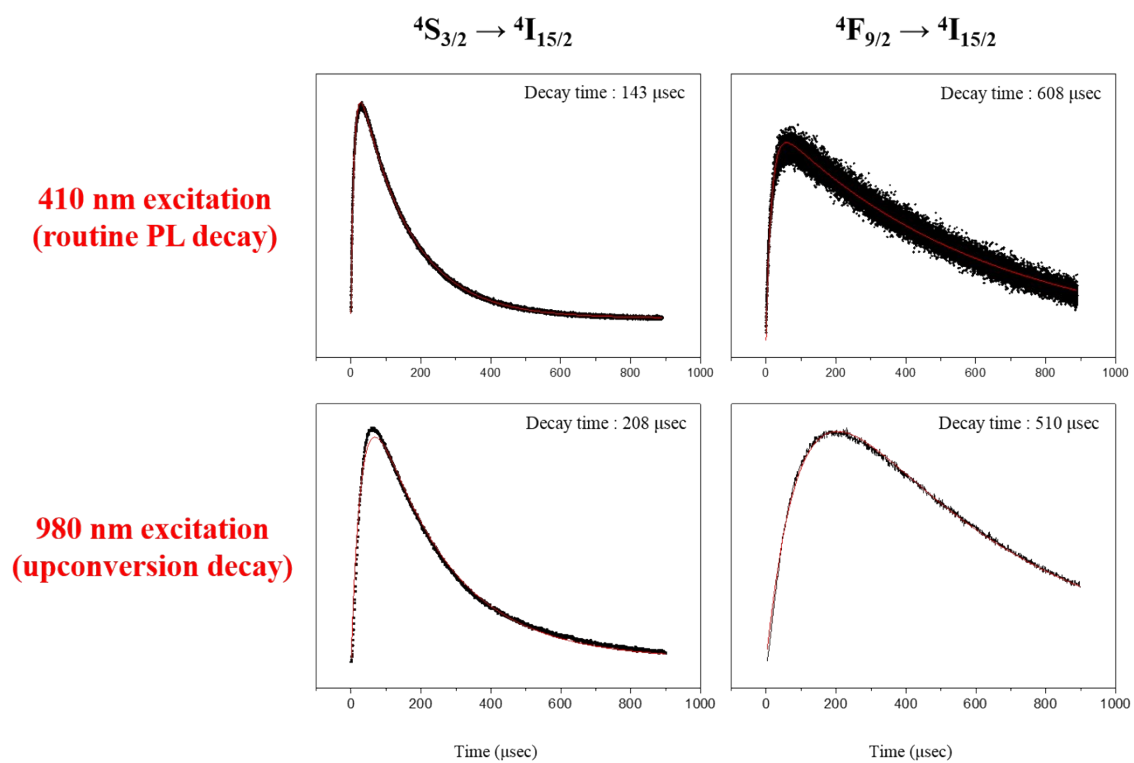

Supplement: c7cp00048k1.pdf [file c7cp00048k1.pdf]
